# Supplementary material
Source: PubMed Central journal article supplement (PMC3457100)

## Supplementary material

**Fig. S1. A genetic system for gene disruption in *Msm*.** Plasmid pML2424 is designed to facilitate the isolation of mutants that result from homologous recombination. It confers hygromycin resistance, has a temperature-sensitive mycobacterial origin of replication and a ColE1 origin used for replication in *Escherichia coli*. In addition, it expresses both GFP and RFP from constitutive mycobacterial promoters. Consequently, at a restrictive temperature (42°C), double cross-over clones that result from homologous recombination express GFP, but not RFP, and can be easily detected on plates using fluorescence microscopy or a fluorescence imager. To facilitate the isolation of such mutants, pML2424 carries the *sacB* gene, enabling counter selection on plates containing sucrose (10 % W/V). In our study, the upstream (US) flanking region was amplified by PCR and cloned into the *SpeI* and *SwaI* cut sites of plasmid pML2424. Similarly, the downstream (DS) flanking region was cloned into the *PacI* and *NsiI* cut sites. Following successful deletion using pML2424, plasmid pML2714 can be used to facilitate excision of the *gfp-hyg* cassette from the chromosome via *loxP* site-specific recombination.

**Fig. S2. Knocking out the *ect* operon.** (A) Schematic diagram of the homologous recombination event that led to replacement of the chromosomal copy of the *ect* operon with the *gfp-hyg* cassette of pML2424. Using plasmid pML2714, a *loxP* site-specific recombination catalyzed by the Cre recombinase results in excision of the *gfp-hyg* cassette from the *Msm* chromosome. (B) PCR analyses of the wild-type and the  $\Delta ect$  mutant strains. In the right panel, the PCR reactions were with internal *ect* primers [dotted lines; primers 11 and 12 (Table S1)]. In the left panel, the PCR reactions were with external *ect* primers [solid lines; primers 13 and 14 (Table S1)]. (C) Southern analysis was carried out on *Bam*HI-digested chromosomal DNA preps from the wild-type and the  $\Delta ect$  mutant strains. The external probe used in the assay [right panel; primers 15 and 16 (Table S1)] hybridized with a DNA fragment comprising the upstream flanking region. The internal probe [left panel; primers 17 and 18 (Table 1)] hybridized with a DNA fragment from within the *ect* operon.

**Fig. S3. Complementation of the *ect* operon deletion.** The *Msm ect* operon including 875 bp upstream the *ectA* translation start site was cloned into the *KpnI* – *XbaI* cut-sites of the mycobacterial shuttle vector, pMV206. The cloned plasmid was transformed into the  $\Delta ect$  mutant and a spot-test assay was carried out (as in Fig. 3A) on plates containing 1 M NaCl and kanamycin (10 µg/mL). As controls, mutant and wild-type strains were used, both carrying empty pMV206 vectors.

**Table S1. Primers used for analysis in this study**

| #  | Primer name | Primer sequences (5'→3')             | Hybridized DNA                 |
|----|-------------|--------------------------------------|--------------------------------|
| 1  | ectB F      | TCATGCCCGTGAAATGCGT                  | <i>ectB</i>                    |
| 2  | ectB R      | GGTGGAATCCGCGCTG                     | <i>ectB</i>                    |
| 3  | sigA F      | GAAGACACCGACCTGGAAC                  | <i>sigA</i>                    |
| 4  | sigA R      | GACTCTTCTCGTCCCACAC                  | <i>sigA</i>                    |
| 5  | ectAB F     | ACCGATCGGGGTCTGAGG                   | <i>ectAB</i> junction          |
| 6  | ectAB R     | AACCTCAGGCAGGTCCGA                   | <i>ectAB</i> junction          |
| 7  | ectBC F     | CGATCGCAGTCACCTTGA                   | <i>ectBC</i> junction          |
| 8  | ectBC R     | AAACCCACCTTGTCGTCG                   | <i>ectBC</i> junction          |
| 9  | ectCD F     | CATGCTGTGCGTCTTCAA                   | <i>ectCD</i> junction          |
| 10 | ectCD R     | GGTGTCGTCTGGGTGGTC                   | <i>ectCD</i> junction          |
| 11 | ectC F      | AGGAGAACACCCATGATT                   | <i>ectC</i>                    |
| 12 | ectD R      | GAAATCCGAGTGCCAATA                   | <i>ectD</i>                    |
| 13 | ect US F2   | AGTACCTGTAGGACCCGC                   | <i>ectA</i> up-stream region   |
| 14 | ect DS R2   | TTGATGATGCCGCGTTTG                   | <i>ectD</i> down-stream region |
| 15 | ect US F    | ATGACTATTTAAATTCOAAGTTCTC<br>GATGAAC | <i>ectA</i> up-stream region   |
| 16 | ectUS R2    | TTTTCGACAGCGTCAGA                    | <i>ectA</i> up-stream region   |
| 17 | ectA int F  | CATCACTGGTTACCACCC                   | <i>ectA</i>                    |
| 18 | ectB int R  | AGTAGCTACGGACCTCGG                   | <i>ectB</i>                    |

Fig. S1

*ect* genes

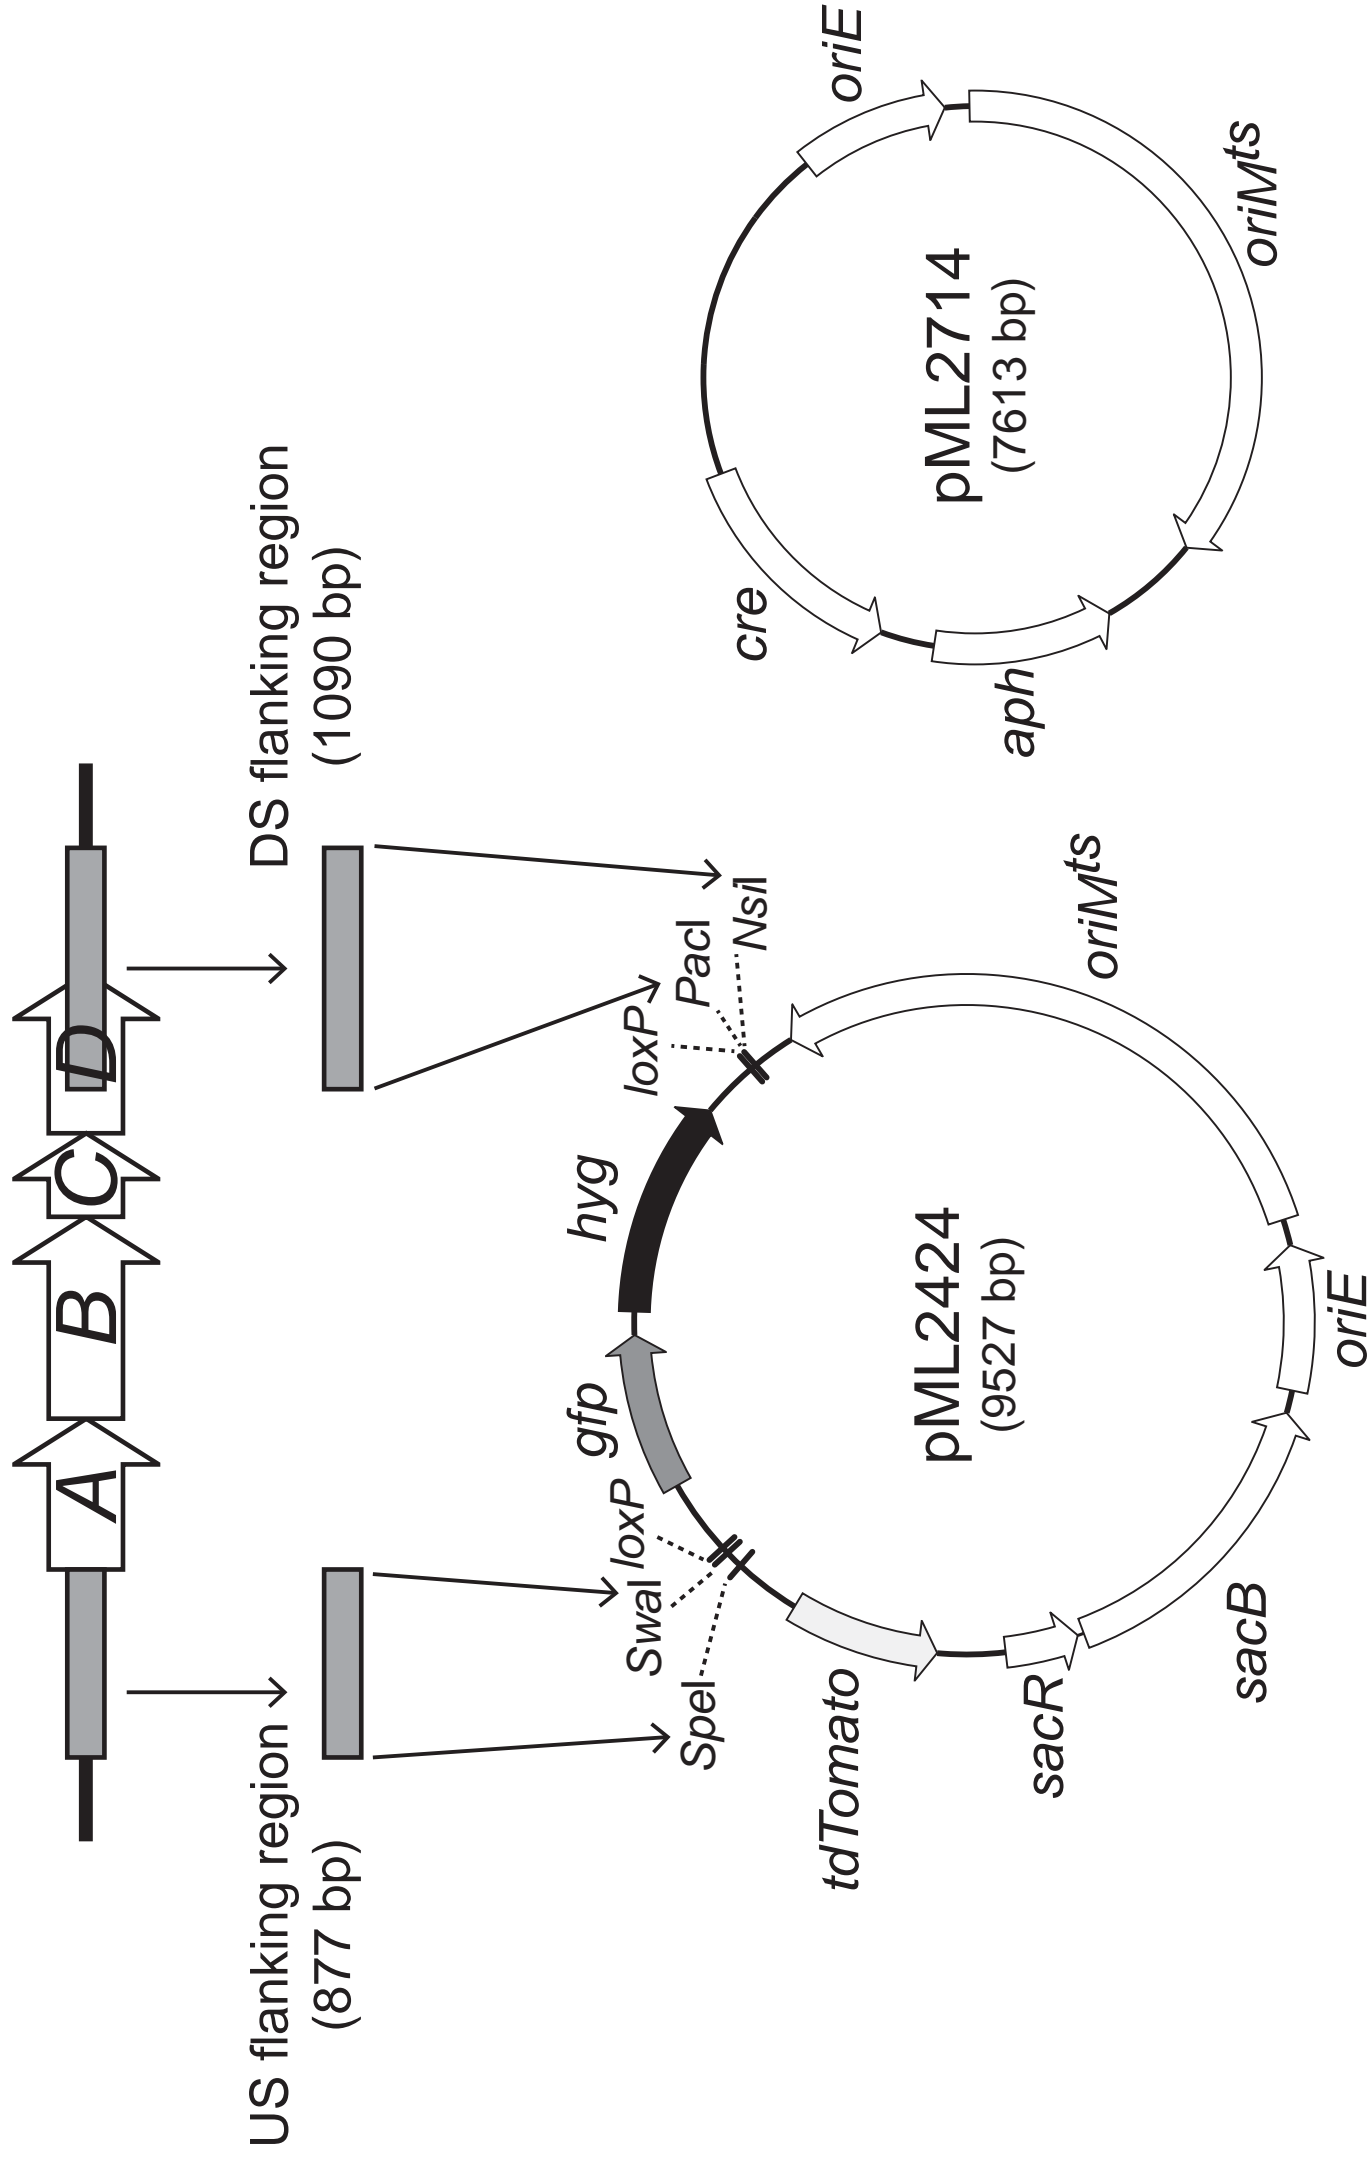

Fig. S2

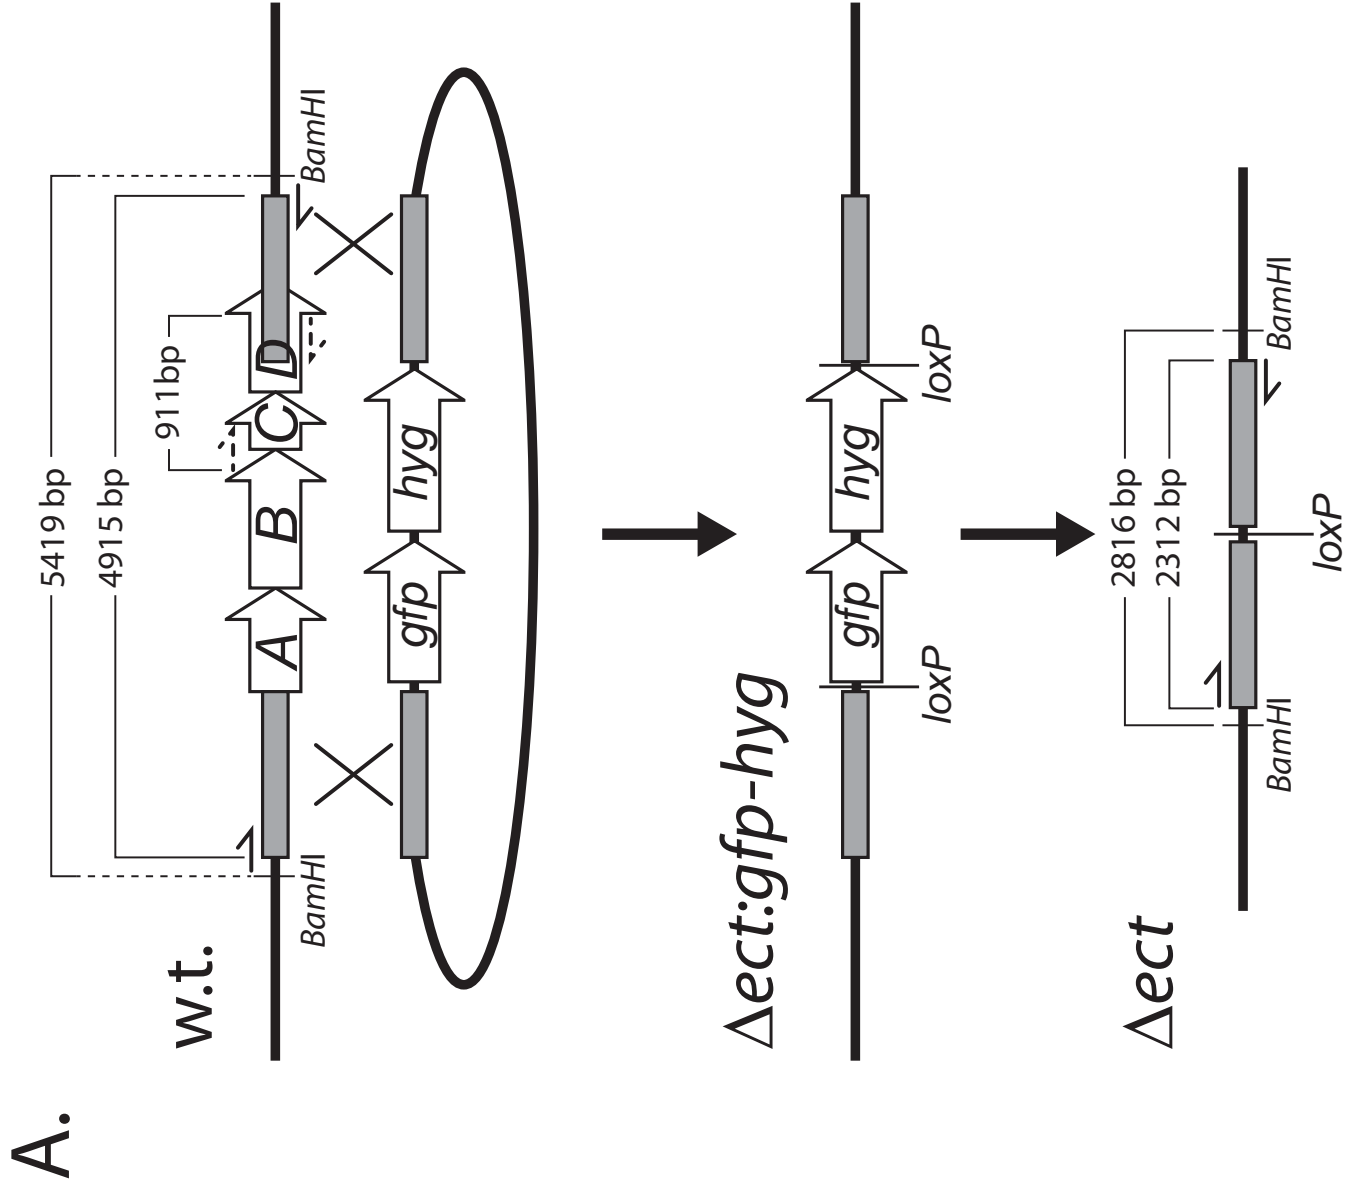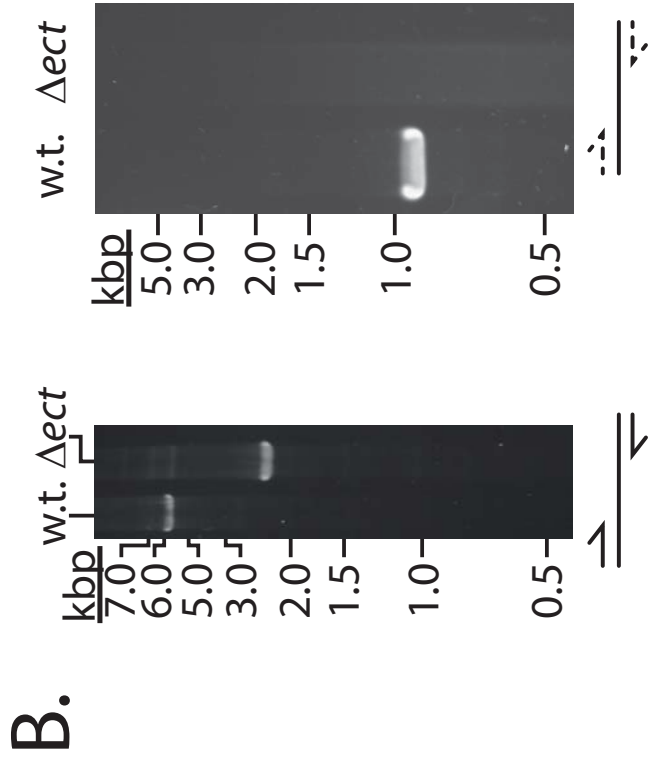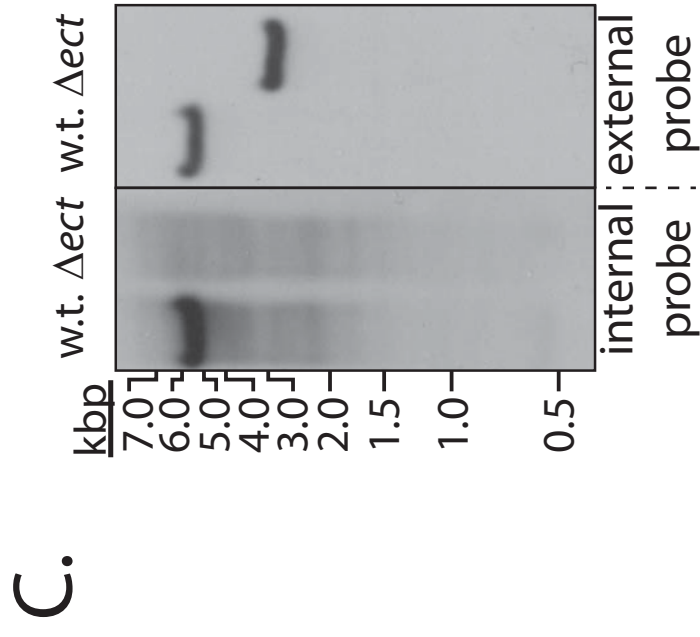

Fig. S3

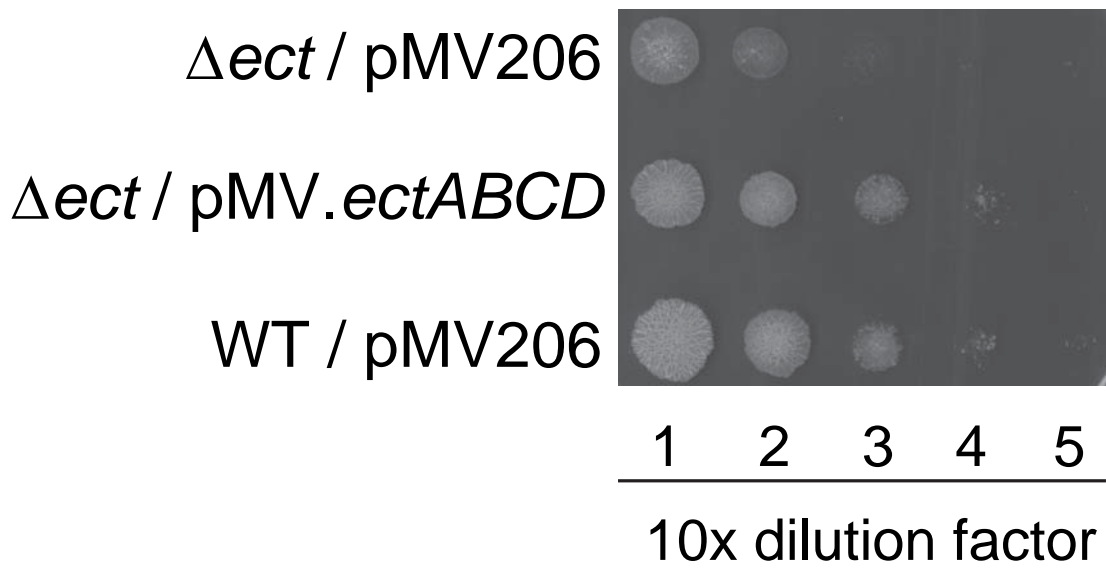

Supplement: AEM.01318-12_zam999103756so1.pdf [file AEM.01318-12_zam999103756so1.pdf]
